# Supplementary material
Source: PubMed Central journal article supplement (PMC3428269)
Supplement: halms666043-supplement_1.pdf [file halms666043-supplement_1.pdf]

**Table S1:** List of the genes analyzed by quantitative RT-PCR using TaqMan Gene Expression Assays

| Gene symbol | Name                                                    | Unigene reference | TaqMan® Gene expression Assay Reference |
|-------------|---------------------------------------------------------|-------------------|-----------------------------------------|
| 18S         | Eukaryotic 18S rRNA                                     | -                 | Hs99999901_s1                           |
| AHR         | aryl hydrocarbon receptor                               | Hs.171189         | Hs00169233_m1                           |
| B2M         | beta-2-microglobulin                                    | Hs.534255         | Hs99999907_m1                           |
| BCL6        | B-cell CLL/lymphoma 6                                   | Hs.478588         | Hs00277037_m1                           |
| BTLA        | B and T lymphocyte associated (CD272)                   | Hs.445162         | Hs00699198_m1                           |
| CASC3       | cancer susceptibility candidate 3                       | Hs.725173         | Hs00201226_m1                           |
| CCR4        | chemokine (C-C motif) receptor 4                        | Hs.184926         | Hs99999919_m1                           |
| CCR6        | chemokine (C-C motif) receptor 6                        | Hs.46468          | Hs00171121_m1                           |
| CCR7        | chemokine (C-C motif) receptor 7                        | Hs.370036         | Hs00171054_m1                           |
| CCR8        | chemokine (C-C motif) receptor 8                        | Hs.113222         | Hs00174764_m1                           |
| CD200       | CD200 molecule                                          | Hs.79015          | Hs01033303_m1                           |
| CD40LG      | CD40 ligand (CD154)                                     | Hs.592244         | Hs00163934_m1                           |
| CTLA4       | cytotoxic T-lymphocyte-associated protein 4 (CD152)     | Hs.247824         | Hs00175480_m1                           |
| CXCL13      | chemokine (C-X-C motif) ligand 13                       | Hs.100431         | Hs00757930_m1                           |
| CXCR3       | chemokine (C-X-C motif) receptor 3                      | Hs.198252         | Hs00171041_m1                           |
| CXCR5       | chemokine (C-X-C motif) receptor 5                      | Hs.113916         | Hs00173527_m1                           |
| CYP1A1      | cytochrome P450, family 1, subfamily A, polypeptide 1   | Hs.72912          | Hs00153120_m1                           |
| ENTPD1      | ectonucleoside triphosphate diphosphohydrolase 1 (CD39) | Hs.576612         | Hs00169946_m1                           |
| FOXP3       | forkhead box P3                                         | Hs.247700         | Hs00203958_m1                           |
| GATA3       | GATA binding protein 3                                  | Hs.524134         | Hs00231122_m1                           |
| ICOS        | inducible T-cell co-stimulator (CD278)                  | Hs.56247          | Hs00359999_m1                           |
| IFNG        | interferon, gamma                                       | Hs.856            | Hs00174143_m1                           |
| IL10        | interleukin 10                                          | Hs.193717         | Hs99999035_m1                           |
| IL13        | interleukin 13                                          | Hs.845            | Hs00174379_m1                           |
| IL17A       | interleukin 17A                                         | Hs.41724          | Hs00174383_m1                           |
| IL17F       | interleukin 17F                                         | Hs.272295         | Hs00369400_m1                           |
| IL2         | interleukin 2                                           | Hs.89679          | Hs00174114_m1                           |
| IL21        | interleukin 21                                          | Hs.567559         | Hs00222327_m1                           |
| IL22        | interleukin 22                                          | Hs.287369         | Hs00220924_m1                           |
| IL25        | interleukin 25                                          | Hs.302036         | Hs00224471_m1                           |
| IL26        | interleukin 26                                          | Hs.272350         | Hs00218189_m1                           |
| IL27        | interleukin 27                                          | Hs.528111         | Hs00377366_m1                           |
| IL4         | interleukin 4                                           | Hs.73917          | Hs00174122_m1                           |

|                 |                                                        |           |               |
|-----------------|--------------------------------------------------------|-----------|---------------|
| <i>LTA</i>      | lymphotoxin alpha (TNF superfamily, member 1)          | Hs.36     | Hs00236874_m1 |
| <i>LTB</i>      | lymphotoxin beta (TNF superfamily, member 3)           | Hs.376208 | Hs00242737_m1 |
| <i>MAF</i>      | v-maf musculoaponeurotic fibrosarcoma oncogene homolog | Hs.134859 | Hs00193519_m1 |
| <i>MME</i>      | membrane metallo-endopeptidase (CD10)                  | Hs.307734 | Hs00153510_m1 |
| <i>OSM</i>      | oncostatin M                                           | Hs.248156 | Hs00171165_m1 |
| <i>PDCD1</i>    | programmed cell death 1 (CD279)                        | Hs.158297 | Hs00169472_m1 |
| <i>PRDM1</i>    | PR domain containing 1, with ZNF domain                | Hs.436023 | Hs00153357_m1 |
| <i>RC3H1</i>    | ring finger and CCCH-type zinc finger domains 1        | Hs.30258  | Hs02577215_m1 |
| <i>RORA</i>     | RAR-related orphan receptor A                          | Hs.560343 | Hs00536545_m1 |
| <i>RORC</i>     | RAR-related orphan receptor C                          | Hs.256022 | Hs01076112_m1 |
| <i>SH2D1A</i>   | SH2 domain protein 1A                                  | Hs.349094 | Hs00158978_m1 |
| <i>TBX21</i>    | T-box 21                                               | Hs.272409 | Hs00203436_m1 |
| <i>TGFB1</i>    | transforming growth factor, beta 1                     | Hs.645227 | Hs99999918_m1 |
| <i>TNF</i>      | tumor necrosis factor (TNF superfamily, member 2)      | Hs.241570 | Hs00174128_m1 |
| <i>TNFRSF18</i> | tumor necrosis factor receptor superfamily, member 18  | Hs.212680 | Hs00188346_m1 |

**Table S2:** Antibodies used for flow cytometry

| <b>Anti-human antibody</b> | <b>Conjugation*</b> | <b>Supplier**</b> |
|----------------------------|---------------------|-------------------|
| Caspase 3                  | PE                  | BD                |
| CD2                        | PC7                 | BC                |
| CD3                        | ECD                 | BC                |
| CD4                        | FITC                | BC                |
| CD4                        | PC7                 | BC                |
| CD19                       | FITC                | BC                |
| CD20                       | FITC                | BC                |
| CD25                       | APC                 | BD                |
| CD25                       | PC5.5               | BD                |
| CD25                       | PC7                 | BD                |
| CD57                       | FITC                | BC                |
| CD86                       | PE                  | BC                |
| CD127                      | A647                | BD                |
| CD200                      | A647                | S                 |
| CXCR5                      | PE                  | RD                |
| FOXP3                      | PE                  | EB                |
| ICOS                       | BIOT                | EB                |
| IFN- $\gamma$              | PE                  | BD                |
| IL-4                       | PE                  | BD                |
| kappa                      | FITC                | BC                |
| lambda                     | FITC                | BC                |
| PD-1                       | A647                | EB                |
| PD-1                       | FITC                | EB                |

\* FITC: fluorescein isothiocyanate; PE: phycoerythrin; PC5.5: phycoerythrin cyanin 5.5; PC7: phycoerythrin cyanin 7; APC: allophycocyanin; ECD: energy-coupled-dye; A647: AlexaFluor 647; BIOT: biotinylated monoclonal antibody (revealed by streptavidin-ECD, PC5 or PC7 from Beckman Coulter)

\*\* BC: Beckman Coulter (Fullerton, CA); BD: BD Biosciences (San Diego, CA); EB: eBioscience (San Diego, CA); RD: R&D Systems (Abingdon, UK); S: AbD Serotec (Oxford, UK).
